# Supplementary material
Source: PubMed Central journal article supplement (PMC8033758)
Supplement: pt1c00011_si_001.pdf [file pt1c00011_si_001.pdf]

## Supporting information

### **Exploring the cytotoxic effects of the extracts and bioactive triterpenoids from *Dillenia indica* against oral squamous cell carcinoma: A scientific interpretation and validation of indigenous knowledge.**

Maniyamma Aswathy <sup>a,b,#</sup>, Kishore Banik <sup>c,#</sup>, Dey Parama <sup>c,#</sup>, Parameswaran Sasikumar <sup>a</sup>, Choudhary Harsha <sup>c</sup>, Anuja Gracy Joseph <sup>a,b</sup>, Daisy R. Sherin <sup>d</sup>, Manojkumar K. Thanathu <sup>d</sup>, Ajaikumar B. Kunnumakkara <sup>c,\*</sup>, Radhakrishnan Kokkuvayil Vasu <sup>a,b,\*</sup>

<sup>a</sup> Chemical Sciences and Technology Division, CSIR-National Institute for Interdisciplinary Science and Technology (CSIR-NIIST), Thiruvananthapuram 695019, India

<sup>b</sup> Academy of Scientific and Innovative Research (AcSIR), Ghaziabad- 201002, India

<sup>c</sup> Cancer Biology Laboratory and DBT-AIST International Center for Translational & Environmental Research (DAICENTER), Department of Biosciences and Bioengineering, Indian Institute of Technology Guwahati, Assam 781039, India

<sup>d</sup> Centre for Computational Modeling and Data Engineering, Indian Institute of Information Technology and Management-Kerala (IIITM-K), Thiruvananthapuram 695581, India

# The authors have contributed equally

#### **LIST OF CONTENTS**

| <b>Session</b> | <b>Details</b>                                     | <b>Page No</b> |
|----------------|----------------------------------------------------|----------------|
| <b>1</b>       | <b>Supporting information figure S<sub>1</sub></b> | <b>S1</b>      |
| <b>2</b>       | <b>Supporting information figure S<sub>2</sub></b> | <b>S2</b>      |
| <b>3</b>       | <b>Supporting information figure S<sub>3</sub></b> | <b>S2</b>      |
| <b>4</b>       | <b>Structural elucidation by NMR techniques</b>    | <b>S3 – S8</b> |
| <b>5</b>       | <b>Molecular level MTT assay</b>                   | <b>S9</b>      |
| <b>6</b>       | <b>Computational Screening</b>                     | <b>S9-S10</b>  |

## Supporting Figures

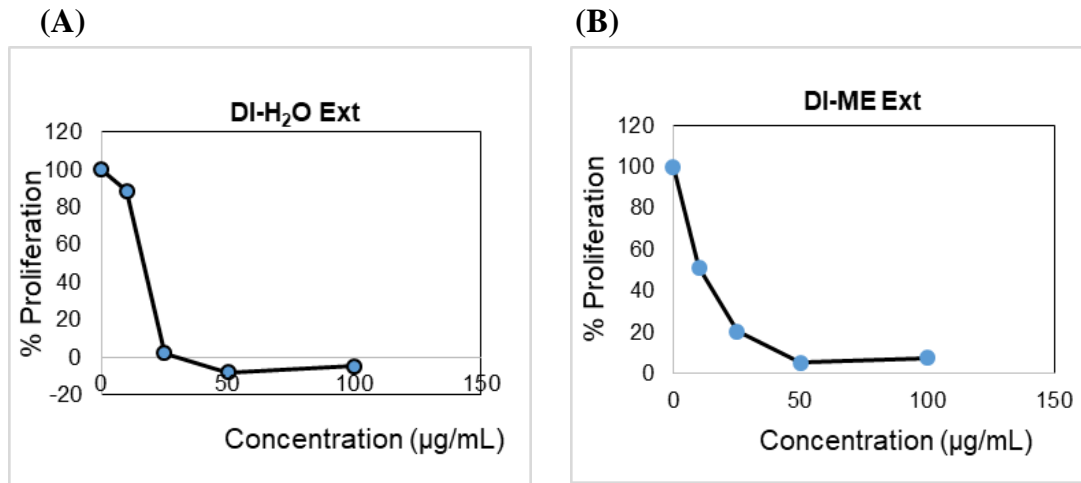

**Figure S1:** Inhibition of the proliferation of SAS cells by: (A) DI-H<sub>2</sub>O Ext, with IC<sub>50</sub> of 14 µg/mL (B) DI-ME Ext. with IC<sub>50</sub> of 12 µg/mL.

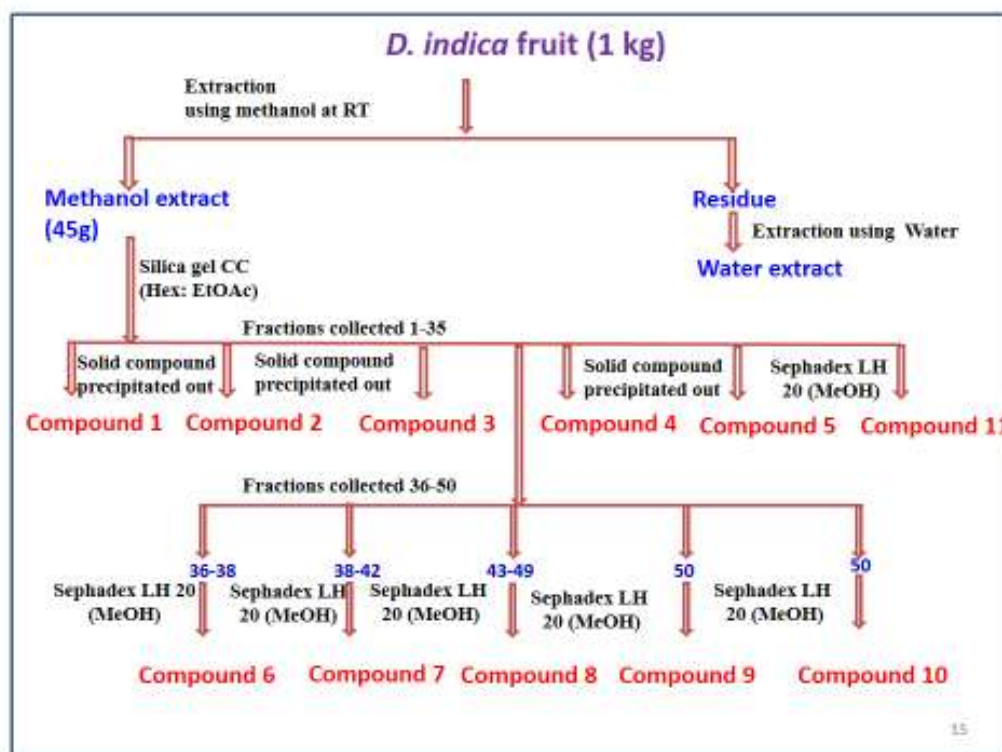

**Figure S2:** Extraction strategy and Isolation procedure from DI-ME Ext

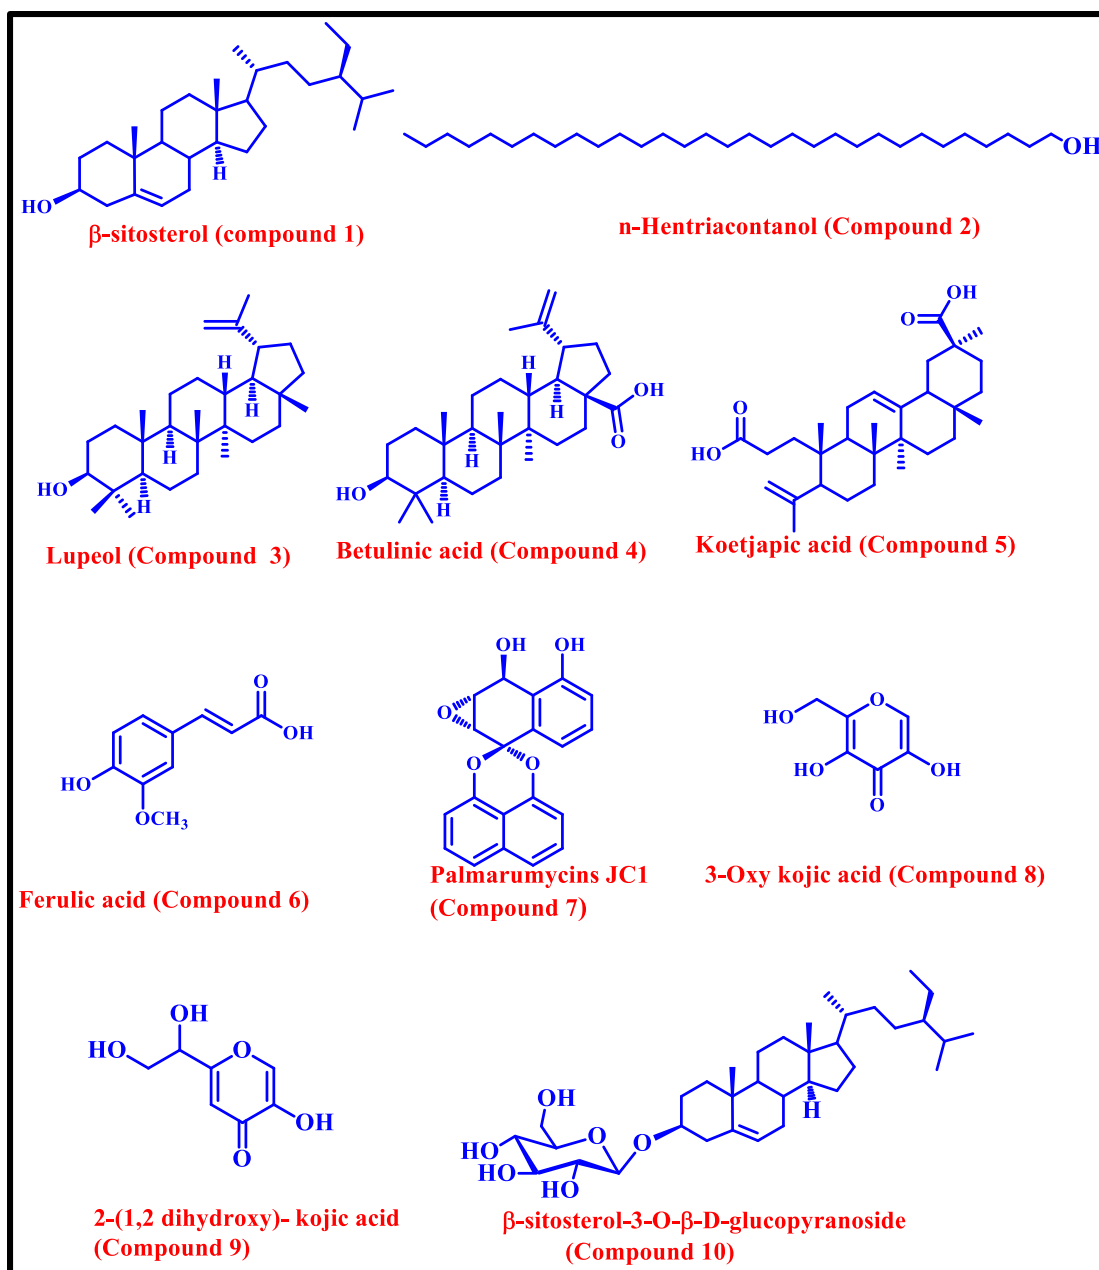

**Figure S3:** Structure of the molecules isolated from DI-ME Ext

**Effect of isolated compounds on the proliferation of SAS cells.**

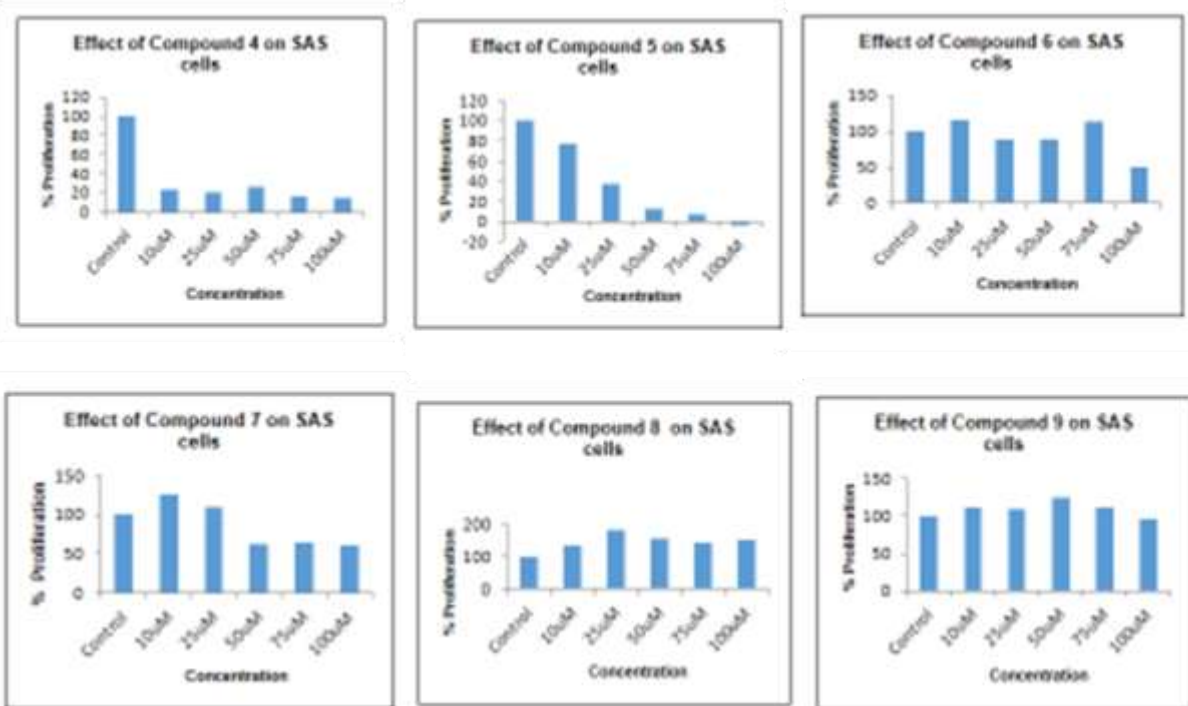

**Figure S4:** MTT assay of isolated molecules

Tables

|                                                     |   |                                                                                                                                                                                                                                                                               |
|-----------------------------------------------------|---|-------------------------------------------------------------------------------------------------------------------------------------------------------------------------------------------------------------------------------------------------------------------------------|
| Melting point                                       | : | 128-130 °C                                                                                                                                                                                                                                                                    |
| Molecular formula                                   | : | C <sub>29</sub> H <sub>50</sub> O                                                                                                                                                                                                                                             |
| FT-IR (Neat) $\nu_{\max}$                           | : | 3408, 3272, 2935, 2863, 1645, 1459, 1374, 1316, 1257, 1190, 1099, 1054, 1024, 958, 802 cm <sup>-1</sup>                                                                                                                                                                       |
| <sup>1</sup> H NMR<br>(500 MHz, CDCl <sub>3</sub> ) | : | $\delta$ 5.37(d, 1H, $J=5$ Hz), 3.53-3.54(m, 1H), 2.30-2.29(m, 2H), 2.04-1.87 (m, 2H), 1.87-1.84(m, 3H), 1.68-1.66 (m, 2H), 1.60-1.45 (m, 7H), 1.32-1.23 (m, 6H), 1.20-1.10 (m, 3H), 1.09-1.96 (m, 3H), 1.02 (s, 5H), 0.94- 0.93 (m, 3H), 0.87-0.71 (m 9H), 0.69 (s, 3H) ppm. |
| <sup>13</sup> C NMR<br>(125 MHz,CDCl <sub>3</sub> ) | : | $\delta$ 140.8,121.7, 71.8, 56.8, 56.0, 50.1, 45.8, 42.3, 42.3, 39.8, 37.2, 36.5, 36.2, 33.9, 31.9, 31.7, 29.1, 28.3, 26.0, 24.3, 23.0, 21.1, 19.8, 19.4, 19.0, 18.8, 11.9, 11.9 ppm.                                                                                         |

|     |   |                            |
|-----|---|----------------------------|
| m/z | : | 415.1097(M+H) <sup>+</sup> |
|-----|---|----------------------------|

**Table S1:** NMR characterization data of compound 1

|                                                      |   |                                                                                                                           |
|------------------------------------------------------|---|---------------------------------------------------------------------------------------------------------------------------|
| Melting point                                        | : | 97-99 °C                                                                                                                  |
| Molecular formula                                    | : | C <sub>31</sub> H <sub>64</sub> O                                                                                         |
| FT-IR (Neat) $\nu_{\max}$                            | : | 3318, 2927, 1046 cm <sup>-1</sup>                                                                                         |
| <sup>1</sup> H NMR<br>(500 MHz, CDCl <sub>3</sub> )  | : | $\delta$ 3.65 (t, <i>J</i> = 6.5 Hz, 2H), 1.60 – 1.55 (m, 5H), 1.36 – 1.22 (m, 54H), 0.88 (t, <i>J</i> = 6.5 Hz, 3H) ppm. |
| <sup>13</sup> C NMR<br>(125 MHz, CDCl <sub>3</sub> ) | : | $\delta$ 63.1, 32.8, 31.9, 29.7, 29.6, 29.6, 29.5, 29.4, 25.7, 22.70, 14.1 ppm.                                           |
| m/z                                                  | : | 453.5035 (M+H) <sup>+</sup>                                                                                               |

**Table S2:** NMR characterization data of compound 2

|                                                      |   |                                                                                                                                                                                                                                                                                                              |
|------------------------------------------------------|---|--------------------------------------------------------------------------------------------------------------------------------------------------------------------------------------------------------------------------------------------------------------------------------------------------------------|
| Melting point                                        | : | 215-217 °C                                                                                                                                                                                                                                                                                                   |
| Molecular formula                                    | : | C <sub>30</sub> H <sub>50</sub> O                                                                                                                                                                                                                                                                            |
| FT-IR (Neat) $\nu_{\max}$                            | : | 3408, 3272, 2935, 2863, 1645, 1459, 1374, 1316, 1257, 1190, 1099 cm <sup>-1</sup>                                                                                                                                                                                                                            |
| <sup>1</sup> H NMR<br>(500 MHz, CDCl <sub>3</sub> )  | : | $\delta$ 4.74 (s, 1H), 4.61 (s, 1H), 3.19 (dd, <i>J</i> <sub>1</sub> = 11.5, <i>J</i> <sub>2</sub> = 4.4 Hz, 2H), 2.28-2.17 (m, 2H), 2.03-1.94 (m, 2H), 1.69-1.66 (m, 9H), 1.63 – 1.61 (m, 10H), 1.59-1.37 (m, 20H), 1.25 (s, 3H), 0.97 (s, 3H), 0.96 (s, 3H), 0.93 (s, 3H), 0.82 (S, 3H), 0.75 (s, 3H) ppm. |
| <sup>13</sup> C NMR<br>(125 MHz, CDCl <sub>3</sub> ) | : | $\delta$ 150.7, 109.9, 79.1, 56.3, 55.3, 53.2, 50.5, 46.9, 42.4, 38.9, 38.3, 37.2, 37.1, 32.2, 29.5, 27.9, 25.4, 22.7, 18.3, 16.1, 16.0, 15.3, 14.6, 14.2 ppm.                                                                                                                                               |
| m/z                                                  | : | 427.3939 (M + H) <sup>+</sup>                                                                                                                                                                                                                                                                                |

**Table S3:** NMR characterization data of compound 3

|                                                        |   |                                                                                                                                                                                                                                                                     |
|--------------------------------------------------------|---|---------------------------------------------------------------------------------------------------------------------------------------------------------------------------------------------------------------------------------------------------------------------|
| Melting point                                          | : | 312-314 °C                                                                                                                                                                                                                                                          |
| Molecular formula                                      | : | C <sub>30</sub> H <sub>48</sub> O <sub>3</sub>                                                                                                                                                                                                                      |
| FT-IR (Neat) $\nu_{\max}$                              | : | 3428, 3075, 2944, 2671, 1693, 1454, 1440, 1379, 1143 cm <sup>-1</sup>                                                                                                                                                                                               |
| <sup>1</sup> H NMR<br>(500 MHz, DMSO d <sub>6</sub> )  | : | $\delta$ 12.08 (s, 1H), 4.69 (d, <i>J</i> = 2Hz, 1H), 4.56 (s, 1H), 4.28 (s, 1H), 3.02 – 2.93 (m, 2H), 2.25 – 2.19 (m, 1H), 2.12-2.09 (M, 1H), 1.84 – 1.77 (m, 2H), 1.65 (s, 3H), 1.54 – 1.08 (m, 20H), 0.93 (s, 3H), 0.87 (s, 6H), 0.77 (s, 3H), 0.65 (s, 3H) ppm. |
| <sup>13</sup> C NMR<br>(125 MHz, DMSO d <sub>6</sub> ) | : | $\delta$ 177.7, 150.8, 110.1, 77.2, 55.9, 55.4, 50.4, 48.9, 47.1, 42.5, 38.9, 38.7, 38.0, 37.2, 36.8, 34.4, 32.2, 30.6, 29.7, 28.6, 27.6, 25.5, 20.9, 19.4, 18.4, 16.4, 16.3, 16.2, 14.8 ppm.                                                                       |
| m/z                                                    | : | 455.3525(M-H) <sup>+</sup>                                                                                                                                                                                                                                          |

**Table S4:** NMR characterization data of compound 4

|                                       |   |                                                                                                                                                                                                                                                                                                                                                                                         |
|---------------------------------------|---|-----------------------------------------------------------------------------------------------------------------------------------------------------------------------------------------------------------------------------------------------------------------------------------------------------------------------------------------------------------------------------------------|
| Melting point                         | : | 296-298 °C                                                                                                                                                                                                                                                                                                                                                                              |
| Molecular formula                     | : | C <sub>30</sub> H <sub>46</sub> O <sub>4</sub>                                                                                                                                                                                                                                                                                                                                          |
| FT-IR (Neat) $\nu_{\max}$             | : | 3440, 2978, 2860, 1706, 1702, 1698, 1694, 1454, 1387, 1281, 1230, 1192, 906 cm <sup>-1</sup>                                                                                                                                                                                                                                                                                            |
| <sup>1</sup> H NMR<br>(500 MHz, DMSO) | : | $\delta$ 5.17 (s, 1H), 4.40 (d, <i>J</i> = 4.5 Hz, 2H), 4.31 (d, <i>J</i> = 4.5 Hz, 1H), 2.74 (dd, <i>J</i> <sub>1</sub> = 9.5, <i>J</i> <sub>2</sub> = 4 Hz, 2H), 1.96 – 1.83 (m, 4H), 1.78 – 1.57 (m, 1H), 1.57 – 1.39 (m, 6H), 1.32-1.30 (m, 2H), 1.23- 1.18 (m, 4H), 1.15-0.98 (m, 7H), 0.92 (s, 3H), 0.90 (s, 3H), 0.88 (s, 6H), 0.79-0.75 (m, 2H), 0.71 (s,3H), 0.70 (s, 3H) ppm. |
| <sup>13</sup> C NMR<br>(125 MHz,DMSO) | : | $\delta$ 177.8, 176.9, 146.9, 144.4, 121.8, 107.9, 82.8, 67.6, 55.2, 47.7, 47.5, 46.3, 46.1, 39.6, 39.4, 38.2, 33.3, 32.7, 32.6, 31.2, 30.2, 29.3, 27.6, 26.0, 23.9, 23.6, 23.09, 18.5, 17.6, 17.4, 16.7 ppm.                                                                                                                                                                           |

|     |   |                            |
|-----|---|----------------------------|
| m/z | : | 469.3317(M-H) <sup>+</sup> |
|-----|---|----------------------------|

**Table S5:** NMR characterization data of compound 5

|                                                                      |   |                                                                                                                                                                                                |
|----------------------------------------------------------------------|---|------------------------------------------------------------------------------------------------------------------------------------------------------------------------------------------------|
| Melting point                                                        | : | 170-172 °C                                                                                                                                                                                     |
| Molecular formula                                                    | : | C <sub>10</sub> H <sub>10</sub> O <sub>4</sub>                                                                                                                                                 |
| FT-IR (Neat) $\nu_{\max}$                                            | : | 3436, 2961, 2933, 2872, 1692, 1128, 1074, 1001cm <sup>-1</sup>                                                                                                                                 |
| <sup>1</sup> H NMR<br>(500 MHz, CD <sub>3</sub> COCD <sub>3</sub> )  | : | $\delta$ 8.27 (bs, 1H), 7.62 (d, $J$ = 16 Hz, 1H), 7.35 (d, $J$ = 2 Hz, 1H), 7.20 (dd, $J_1$ = 8.5, $J_2$ =2 Hz, 1H), 6.90 (d, $J$ = 8.5 Hz, 1H), 6.74 (d, $J$ = 16 Hz, 1H), 3.94 (s, 3H) ppm. |
| <sup>13</sup> C NMR<br>(125 MHz, CD <sub>3</sub> COCD <sub>3</sub> ) | : | $\delta$ 183.7, 149.2, 147.9, 140.5, 130.0, 122.9, 121.4, 115.4, 110.6, 55.4 ppm.                                                                                                              |
| m/z                                                                  | : | 193.0500 (M-H) <sup>+</sup>                                                                                                                                                                    |

**Table S6:** NMR characterization data of compound 6

|                                        |   |                                                                                                                                                                                                                                                                                                            |
|----------------------------------------|---|------------------------------------------------------------------------------------------------------------------------------------------------------------------------------------------------------------------------------------------------------------------------------------------------------------|
| Melting point                          | : | 210-212 °C                                                                                                                                                                                                                                                                                                 |
| Molecular formula                      | : | C <sub>20</sub> H <sub>14</sub> O <sub>5</sub>                                                                                                                                                                                                                                                             |
| FT-IR (Neat) $\nu_{\max}$              | : | 3050, 1605, 1455, 1409 cm <sup>-1</sup>                                                                                                                                                                                                                                                                    |
| <sup>1</sup> H NMR<br>(500 MHz, DMSO)  | : | $\delta$ 9.90 (s, 1H), 7.63 (dd, $J_1$ = 12.5, $J_2$ = 8.5 Hz, 2H), 7.56 (t, $J$ = 7.5 Hz, 1H), 7.51 (t, $J$ = 7.5 Hz, 1H), 7.25 (t, $J$ = 7.5 Hz, 1H), 7.15 – 7.12 (m, 2H), 6.98 – 6.96 (m, 2H), 5.54 (bs, 1H), 5.32 (s, 1H), 3.61 (d, $J$ = 3.5 Hz, 1H), 3.50 (dd, $J_1$ = 4.5, $J_2$ = 2.5 Hz, 1H) ppm. |
| <sup>13</sup> C NMR<br>(125 MHz, DMSO) | : | $\delta$ 156.2, 147.7, 147.7, 134.2, 132.5, 129.5, 128.34, 128.3, 122.9, 121.2, 121.0, 117.6, 116.8, 112.9, 109.8, 109.4, 98.1, 59.5, 53.7, 50.2 ppm.                                                                                                                                                      |
| m/z                                    | : | 357.0691 (M+Na) <sup>+</sup>                                                                                                                                                                                                                                                                               |

**Table S7:** NMR characterization data of compound 7

|                                        |   |                                                                                                            |
|----------------------------------------|---|------------------------------------------------------------------------------------------------------------|
| Melting point                          | : | 153-155 °C                                                                                                 |
| Molecular formula                      | : | C <sub>6</sub> H <sub>6</sub> O <sub>5</sub>                                                               |
| FT-IR (Neat) $\nu_{\max}$              | : | 3271, 3175, 2948, 2668, 1706, 1697 cm <sup>-1</sup>                                                        |
| <sup>1</sup> H NMR<br>(500 MHz, DMSO)  | : | $\delta$ 9.05 (s, 1H), 9.01 (s, 1H), 8.05 (s, 1H), 5.38 (t, J = 5.5 Hz, 1H), 4.40 (d, J = 5.5 Hz, 2H) ppm. |
| <sup>13</sup> C NMR<br>(125 MHz, DMSO) | : | $\delta$ 169.6, 150.7, 144.8, 141.7, 139.8, 55.8 ppm.                                                      |
| m/z                                    | : | 157.0137(M-H) <sup>+</sup>                                                                                 |

**Table S8:** NMR characterization data of compound 8

|                                        |   |                                                                                                                                                   |
|----------------------------------------|---|---------------------------------------------------------------------------------------------------------------------------------------------------|
| Melting point                          | : | 163-167 °C                                                                                                                                        |
| Molecular formula                      | : | C <sub>7</sub> H <sub>8</sub> O <sub>5</sub>                                                                                                      |
| FT-IR (Neat) $\nu_{\max}$              | : | 3270, 3175, 3099, 2948, 2668, 1706, 1697 cm <sup>-1</sup>                                                                                         |
| <sup>1</sup> H NMR<br>(500 MHz, DMSO)  | : | $\delta$ 9.07 (bs, 1H), 8.03 (s, 1H), 6.34 (s, 1H), 5.69 (s, 1H), 4.29 (d, J = 3 Hz, 2H), 4.13 (d, J = 5.0 Hz, 1H), 3.17 (d, J = 4.3 Hz, 1H) ppm. |
| <sup>13</sup> C NMR<br>(125 MHz, DMSO) | : | $\delta$ 174.4, 168.5, 146.1, 139.7, 110.1, 59.9, 49.2 ppm.                                                                                       |
| m/z                                    | : | 171.0293(M-H) <sup>+</sup>                                                                                                                        |

**Table S9:** NMR characterization data of compound 9

|                                                       |   |                                                                                                                          |
|-------------------------------------------------------|---|--------------------------------------------------------------------------------------------------------------------------|
| Melting point                                         | : | 275-284 °C                                                                                                               |
| Molecular formula                                     | : | C <sub>35</sub> H <sub>60</sub> O <sub>6</sub>                                                                           |
| FT-IR (Neat) $\nu_{\max}$                             | : | 3400, 2900 cm <sup>-1</sup> .                                                                                            |
| <sup>1</sup> H NMR<br>(500 MHz, DMSO-d <sub>6</sub> ) | : | $\delta$ 5.34 (d, 1H, J=5Hz), 4.90-4.87 (m, 3H), 4.46-4.44(m, 1H), 4.23 (d, 1H, J=8Hz), 3.64-3.63 (m, 1H), 3.47-3.43 (m, |



|                                                        |   |                                                                                                                                                                                                                                                                                                      |
|--------------------------------------------------------|---|------------------------------------------------------------------------------------------------------------------------------------------------------------------------------------------------------------------------------------------------------------------------------------------------------|
|                                                        |   | 2H), 3.13-3.12 (m, 1H), 3.10-3.07 (m, 1H), 3.02-3.01 (m, 1H), 2.90-2.89 (m, 1H), 2.36-2.35 (m, 1H), 2.13-2.10 (m, 1H), 1.95-1.94 (m, 2H), 1.81-1.79 (m, 3H), 1.53-1.51 (m, 1H), 1.51-1.40 (m, 6H), 1.28-1.23 (m, 6H), 1.21-1.19 (m, 4H), 0.96 (s, 3H), 0.91 (s, 5H), 0.82 (m, 9H), 0.66 (s, 3H) ppm. |
| <sup>13</sup> C NMR<br>(125 MHz, DMSO-d <sub>6</sub> ) | : | δ 140.4, 121.2, 100.7, 99.5, 76.9, 76.7, 73.4, 70.1, 61.1, 56.1, 55.4, 49.6, 45.1, 41.8, 38.3, 36.8, 36.2, 35.4, 33.3, 31.4, 31.3, 29.2, 28.7, 27.8, 25.4, 23.8, 22.6, 20.6, 19.7, 19.1, 18.9, 18.6, 11.8, 11.6 ppm                                                                                  |
| m/z                                                    | : | 577.4013(M+1) <sup>+</sup>                                                                                                                                                                                                                                                                           |

**Table S10:** NMR characterization data of compound 10

### Computational screening of BA and KA

#### QikProp analysis

In order to check the druggability of the ligands-BA and KA, we carried out the QikProp analysis (Table 1-Table S11), which predict the ADME/T properties of the ligands based on the parameters already defined by the software. The important parameters we selected are: #stars (few stars-more drug-like): 0 to 5; M.W.(Molecular Weight):130.0 to 725.0; HBA (Hydrogen bond acceptor): 2.0 to 20.0; HBD(hydrogen bond donor): 0.0 to 6.0; CNS (Central Nervous System activity): -2 to +2; FISA (hydrophilic component of the SASA on N, O, and H on heteroatoms) 7.0 to 330.0; QPlogS (Aqueous solubility): -6.5 to 0.5; QPlogPo/w(octanol/water partition coefficient): -2.0 to 6.5; QPlogKhsa(binding to human serum albumin): -1.5 to 1.5; % HOA (%human oral absorption): >70, good and Ro5(Number of violations of Lipinski's rule of five): maximum is 4. From the output values, it is very clear that both the ligands are druggable with few #stars, 2 hydrogen bond donors and 4 hydrogen bond acceptors. The low CNS value and high %HOA indicate their high oral availability with less central nervous system toxicity. The octanol/water partition coefficient and binding to human serum albumin are also indicated the effectiveness of these drugs with only one violation from the Lipinski's rule of five (Ro5).

**Table S11. Predicted ADME/T properties of BA and KA**

| <i>Compound</i> | <i>#stars</i> | <i>M.W.</i> | <i>HBA</i> | <i>HB<br/>D</i> | <i>CNS</i> | <i>FISA</i> | <i>QPlo<br/>gS</i> | <i>QPlogPo/<br/>w</i> | <i>QPlogKh<br/>sa</i> | <i>%HO<br/>A</i> | <i>Ro<br/>5</i> |
|-----------------|---------------|-------------|------------|-----------------|------------|-------------|--------------------|-----------------------|-----------------------|------------------|-----------------|
|-----------------|---------------|-------------|------------|-----------------|------------|-------------|--------------------|-----------------------|-----------------------|------------------|-----------------|

|           |          |               |            |          |           |               |              |              |             |              |          |
|-----------|----------|---------------|------------|----------|-----------|---------------|--------------|--------------|-------------|--------------|----------|
| <i>BA</i> | <i>0</i> | <i>456.71</i> | <i>3.7</i> | <i>2</i> | <i>-1</i> | <i>95.96</i>  | <i>-6.50</i> | <i>6.09</i>  | <i>1.31</i> | <i>94.20</i> | <i>1</i> |
| <i>KA</i> | <i>0</i> | <i>470.69</i> | <i>4</i>   | <i>2</i> | <i>-2</i> | <i>160.68</i> | <i>-6.09</i> | <i>6.286</i> | <i>1.11</i> | <i>73.69</i> | <i>1</i> |
